# Supplementary material for: Serum 25-Hydroxyvitamin D Is Differentially Associated with Early and Late Age-Related Macular Degeneration in the United States Population
Source: MDPI journal article supplement (doi:10.3390/nu15051216), 2023-02-28
Supplement: s1 [file s1]

**Table S1.** Comparison of demographic and general health factors of participants with or without vitamin D data

| Variables                          | Participants with<br>25(OH)D data | Participants without<br>25(OH)D data | <i>P</i> -value |
|------------------------------------|-----------------------------------|--------------------------------------|-----------------|
| Sample size, n (%)                 | 5041                              | 563                                  |                 |
| Participants with AMD, n (%)       |                                   |                                      | 0.380           |
| No                                 | 4636 (92.0)                       | 527 (93.6)                           |                 |
| Early                              | 354 (7.0)                         | 32 (5.7)                             |                 |
| Advanced                           | 51 (1.0)                          | 4 (0.7)                              |                 |
| Age, years, mean (SD)              | 59.6 (12.5)                       | 58.4 (12.2)                          | 0.036           |
| Sex (female), n (%)                | 2504 (49.7)                       | 289 (51.3)                           | 0.455           |
| Race/ethnicity, n (%)              |                                   |                                      |                 |
| Mexican American                   | 786 (15.6)                        | 78 (13.9)                            | <0.001          |
| Other Hispanic                     | 345 (6.8)                         | 56 (10.0)                            |                 |
| Non-Hispanic White                 | 2791 (55.4)                       | 226 (40.1)                           |                 |
| Non-Hispanic Black                 | 966 (19.2)                        | 173 (30.7)                           |                 |
| Other                              | 153 (3.0)                         | 30 (5.3)                             |                 |
| Education, n (%)                   |                                   |                                      | 0.281           |
| Less than 9 <sup>th</sup> grade    | 720 (14.3)                        | 81 (14.4)                            |                 |
| 9-11 <sup>th</sup> grade           | 744 (14.8)                        | 98 (17.4)                            |                 |
| High school grad/GED or equivalent | 1247 (24.7)                       | 144 (25.6)                           |                 |
| Some college or AA degree          | 1286 (25.10)                      | 145 (25.8)                           |                 |
| College graduate or above          | 1043 (20.7)                       | 95 (16.9)                            |                 |
| Poverty income ratio, n (%)        |                                   |                                      | <0.001          |
| < 130%                             | 1168 (23.2)                       | 159 (28.2)                           |                 |
| 130 - 349%                         | 1808 (35.9)                       | 181 (32.2)                           |                 |
| ≥ 350%                             | 1745 (34.6)                       | 147 (26.1)                           |                 |
| Unknown                            | 320 (6.3)                         | 76 (13.5)                            |                 |
| Obesity, n (%)                     |                                   |                                      | 0.227           |
| Underweight                        | 67 (1.3)                          | 12 (2.1)                             |                 |
| Normal                             | 1214 (24.1)                       | 148 (26.3)                           |                 |
| Overweight                         | 1810 (35.9)                       | 201 (35.7)                           |                 |
| Obese                              | 1911 (37.9)                       | 198 (35.2)                           |                 |
| Unknown                            | 39 (0.8)                          | 4 (0.7)                              |                 |
| Smoking status, n (%)              |                                   |                                      | 0.105           |
| Non-smoker                         | 2388 (47.4)                       | 260 (46.2)                           |                 |
| Past smoker                        | 1645 (32.6)                       | 167 (29.7)                           |                 |
| Current smoker                     | 1006 (19.9)                       | 136 (24.2)                           |                 |
| Unknown                            | 2 (0.1)                           | 0                                    |                 |
| Alcohol consumption, n (%)         |                                   |                                      | <0.001          |
| Never drinker                      | 687 (13.6)                        | 79 (14.0)                            |                 |
| Former drinker                     | 536 (10.6)                        | 54 (9.6)                             |                 |
| Current drinker                    | 3715 (73.7)                       | 395 (70.2)                           |                 |
| Unknown                            | 103 (2.1)                         | 35 (6.2)                             |                 |

|                                     |             |            |        |
|-------------------------------------|-------------|------------|--------|
| General health condition, n (%)     |             |            | <0.001 |
| Excellent, very good, or good       | 3702 (73.4) | 355 (63.1) |        |
| Fair, or poor                       | 1251 (24.8) | 176 (31.3) |        |
| Unknown                             | 88 (1.8)    | 32 (5.6)   |        |
| History of systemic diseases, n (%) |             |            |        |
| Cardiovascular disease              | 770 (15.3)  | 94 (16.7)  | 0.376  |
| Diabetes                            | 1033 (20.5) | 112 (19.9) | 0.738  |
| Hypertension                        | 3364 (66.7) | 370 (65.7) | 0.629  |
| Hypercholesterolemia                | 2084 (41.3) | 196 (34.8) | <0.001 |
| History of ocular condition, n (%)  |             |            |        |
| Cataract operation                  | 633 (12.6)  | 64 (11.4)  | 0.572  |
| Glaucoma                            | 298 (5.9)   | 31 (5.5)   | 0.581  |

---

**Table S2.** Odds ratios and 95% confidence intervals for any and early AMD by quintiles of serum 25(OH)D level

| Serum 25(OH)D<br>(nmol/L) | Any AMD     |                    |                         |                         |                         | Early AMD   |                    |                         |                         |                         |
|---------------------------|-------------|--------------------|-------------------------|-------------------------|-------------------------|-------------|--------------------|-------------------------|-------------------------|-------------------------|
|                           | No. at-risk | No. with event (%) | Crude                   | Model 1†                | Model 2*                | No. at-risk | No. with event (%) | Crude                   | Model 1†                | Model 2*                |
| <b>Overall</b>            |             |                    |                         |                         |                         |             |                    |                         |                         |                         |
| Q1 (<39.9)                | 1019        | 58 (5.69)          | 1.00 (ref)              | 1.00 (ref)              | 1.00 (ref)              | 1009        | 48 (4.76)          | 1.00 (ref)              | 1.00 (ref)              | 1.00 (ref)              |
| Q2 (39.9-53.0)            | 998         | 74 (7.41)          | 1.32 (0.93-1.89)        | 1.16 (0.77-1.73)        | 1.15 (0.77-1.73)        | 988         | 64 (6.48)          | 1.39 (0.94-2.04)        | 1.25 (0.82-1.92)        | 1.24 (0.81-1.91)        |
| Q3 (53.1-64.1)            | 1026        | 77 (7.50)          | 1.34 (0.95-1.91)        | 1.01 (0.67-1.52)        | 0.99 (0.65-1.50)        | 1013        | 64 (6.32)          | 1.35 (0.92-1.98)        | 1.02 (0.65-1.59)        | 1.00 (0.64-1.57)        |
| Q4 (64.2-78.0)            | 993         | 97 (9.77)          | <b>1.79 (1.28-2.51)</b> | 1.45 (0.99-2.15)        | 1.42 (0.95-2.12)        | 986         | 90 (9.13)          | <b>2.01 (1.40-2.89)</b> | <b>1.68 (1.11-2.55)</b> | <b>1.65 (1.08-2.52)</b> |
| Q5 (≥78.1)                | 1005        | 99 (9.85)          | <b>1.81 (1.29-2.53)</b> | 1.35 (0.91-2.02)        | 1.28 (0.85-1.94)        | 994         | 88 (8.85)          | <b>1.94 (1.35-2.80)</b> | <b>1.54 (1.00-2.35)</b> | 1.46 (0.94-2.27)        |
| <b>&lt; 60 years</b>      |             |                    |                         |                         |                         |             |                    |                         |                         |                         |
| Q1 (<39.9)                | 579         | 9 (1.55)           | 1.00 (ref)              | 1.00 (ref)              | 1.00 (ref)              | 579         | 9 (1.55)           | 1.00 (ref)              | 1.00 (ref)              | 1.00 (ref)              |
| Q2 (39.9-53.0)            | 513         | 19 (3.70)          | <b>2.43 (1.09-5.43)</b> | <b>2.72 (1.10-6.78)</b> | <b>2.69 (1.08-6.73)</b> | 513         | 19 (3.70)          | <b>2.43 (1.09-5.43)</b> | <b>2.66 (1.07-6.63)</b> | <b>2.60 (1.04-6.49)</b> |
| Q3 (53.1-64.1)            | 513         | 13 (2.53)          | 1.65 (0.70-3.88)        | 2.16 (0.82-5.71)        | 2.06 (0.77-5.47)        | 513         | 12 (2.34)          | 1.52 (0.64-3.64)        | 1.91 (0.71-5.14)        | 1.80 (0.67-4.86)        |
| Q4 (64.2-78.0)            | 460         | 17 (3.70)          | <b>2.43 (1.07-5.50)</b> | <b>3.06 (1.18-7.91)</b> | <b>2.78 (1.06-7.27)</b> | 460         | 17 (3.70)          | <b>2.43 (1.07-5.50)</b> | <b>2.94 (1.14-7.61)</b> | <b>2.64 (1.01-6.93)</b> |
| Q5 (≥78.1)                | 452         | 13 (2.88)          | 1.88 (0.79-4.43)        | 2.12 (0.77-5.86)        | 1.56 (0.54-4.54)        | 452         | 13 (2.88)          | 1.88 (0.79-4.43)        | 2.04 (0.74-5.64)        | 1.48 (0.51-4.30)        |
| <b>≥ 60 years</b>         |             |                    |                         |                         |                         |             |                    |                         |                         |                         |
| Q1 (<39.9)                | 440         | 49 (11.1)          | 1.00 (ref)              | 1.00 (ref)              | 1.00 (ref)              | 430         | 39 (9.07)          | 1.00 (ref)              | 1.00 (ref)              | 1.00 (ref)              |
| Q2 (39.9-53.0)            | 485         | 55 (11.3)          | 1.02 (0.68-1.54)        | 0.91 (0.58-1.44)        | 0.90 (0.57-1.43)        | 475         | 45 (9.47)          | 1.05 (0.67-1.65)        | 0.97 (0.59-1.59)        | 0.96 (0.58-1.58)        |
| Q3 (53.1-64.1)            | 513         | 64 (12.5)          | 1.14 (0.77-1.69)        | 0.82 (0.52-1.30)        | 0.81 (0.51-1.29)        | 501         | 52 (10.4)          | 1.16 (0.75-1.80)        | 0.84 (0.51-1.39)        | 0.83 (0.50-1.38)        |
| Q4 (64.2-78.0)            | 533         | 80 (15.0)          | 1.41 (0.96-2.06)        | 1.21 (0.78-1.88)        | 1.19 (0.76-1.86)        | 526         | 73 (13.9)          | <b>1.62 (1.07-2.44)</b> | 1.42 (0.89-2.27)        | 1.42 (0.88-2.28)        |
| Q5 (≥78.1)                | 553         | 86 (13.2)          | <b>1.46 (1.01-2.14)</b> | 1.19 (0.76-1.86)        | 1.18 (0.75-1.86)        | 542         | 75 (13.8)          | <b>1.61 (1.07-2.43)</b> | 1.37 (0.86-2.21)        | 1.38 (0.85-2.24)        |

†Model 1: Adjusted for demographic variables (age, sex, race, education, poverty income ratio) and lifestyle variables (BMI, smoking, drinking). \* Model 2: Adjusted for

demographic, lifestyle, medical comorbidity variables (general health condition, cardiovascular disease, diabetes, hypertension, hypercholesterolemia, history of cataract surgery,

and glaucoma) and study cycle (2005-2006 vs. 2007-2008).
